# Supplementary material for: Development of visible-light-responsive Ir and La-codoped KTaO3 photocatalysts for water splitting
Source: Royal Society of Chemistry journal article supplement (doi:10.1039/d1cc04227k), 2021-01-01
Supplement: d1cc04227k1.pdf [file d1cc04227k1.pdf]

## Supporting information

### Development of visible-light-responsive Ir and La-codoped $\text{KTaO}_3$ photocatalyst for water splitting

Akihide Iwase, Haruka Misono

#### Experimental details

##### **Preparation of Ir and La-codoped $\text{ATaO}_3$ (A=Li, Na, K)**

$\text{ATaO}_3$  (A=Li, Na, K) doped with Ir(0.1%) and La(0.2%) (denoted as  $\text{ATaO}_3\text{:Ir,La}$ ) was prepared by a solid-state reaction. Starting materials of  $\text{Li}_2\text{CO}_3$  (Kanto Chemical, 99.0%),  $\text{Na}_2\text{CO}_3$  (Kanto Chemical, 99.8%),  $\text{K}_2\text{CO}_3$  (Kanto Chemical, 99.5%),  $\text{Ta}_2\text{O}_5$  (Rare Metallic, 99.99%), and  $\text{IrO}_2$  (Kojundo Chemical) were mixed at atomic ratios of Li/Ta/Ir/La=1.05:0.999:0.001:0.002 for  $\text{LiTaO}_3\text{:Ir,La}$ , Na/Ta/Ir/La=1.05:0.999:0.001:0.002 for  $\text{NaTaO}_3\text{:Ir,La}$ , and K/Ta/Ir/La=1.1:0.999:0.001:0.002 for  $\text{KTaO}_3\text{:Ir,La}$ . The excess amounts of Li, Na, and K were added to the starting materials to compensate for volatilization during synthesis. The mixture was calcined in air at 1173 K for 1 h and then at 1423 K for 10 h in an alumina crucible. The excess alkali metal ions were removed by rinsing with water after the calcination.

A  $\text{RhCrO}_3$  cocatalyst was impregnated on the  $\text{KTaO}_3$  codoped with Ir and La photocatalyst in advance to demonstrate water splitting. The  $\text{KTaO}_3$  powder and an aqueous solution containing desired amounts of  $\text{Rh}(\text{NO}_3)_3$  (Kanto Chemical, >80% as anhydrous) and  $\text{Cr}(\text{NO}_3)_3$  (Kanto Chemical, 98.0%–103.0%) were placed in a porcelain crucible and dried on a hot plate. The impregnated powder was calcined in air at 623 K for 1 h.

#### **Characterization**

The crystal phase of the prepared powder was analyzed on an X-ray diffractometer (Rigaku, MiniFlex). Diffuse reflectance spectra were obtained using a UV-vis-NIR spectrometer (JASCO, V-650) equipped with an integrating sphere, and were converted from reflection to K-M function by the Kubelka-Munk method. Morphology and particle size of the photocatalyst powder were observed using a scanning electron microscope (JEOL, JSM-7600F).

## Photocatalytic reactions

Sacrificial H<sub>2</sub> and O<sub>2</sub> evolution and overall water splitting were carried out in a gas-closed circulation system with a top-irradiation cell with a Pyrex window. Photocatalyst powder (0.3 g) was dispersed in an aqueous solution (120 mL) containing methanol (10 vol%) and H<sub>2</sub>[PtCl<sub>6</sub>] (0.3 wt% Pt with respect to the photocatalyst) for the sacrificial H<sub>2</sub> evolution. Meanwhile, photocatalyst powder (0.3 g) was dispersed in an aqueous solution (120 mL) containing AgNO<sub>3</sub> (0.02 mol L<sup>-1</sup>) for the sacrificial O<sub>2</sub> evolution. Overall water splitting was also demonstrated using RhCrO<sub>3</sub>-loaded KTaO<sub>3</sub> codoped with Ir and La (0.3 g) dispersed in water (120 mL). A 300 W Xe lamp (PerkinElmer, Cermax PE300BF) was used as a light source, and the wavelength of the irradiated light was controlled to visible light using long-pass filters (HOYA L42, Y48, Y50, Y52, O54, O56, R60), if necessary. The amounts of evolved gases were determined using an online gas chromatograph (Shimadzu, GC-8A, TCD detector, MS-5A column, Ar carrier). Apparent quantum yields (AQY) for the sacrificial H<sub>2</sub> and O<sub>2</sub> evolution were estimated using the following equation.

$$[\text{AQY}\%] = 100 \times [\text{the number of reacted electrons or holes}] / [\text{the number of incident photons}]$$

$$= 100 \times [\text{the number of evolved H}_2 \text{ molecules}] \times 2 / [\text{the number of incident photons}]$$

$$= 100 \times [\text{the number of evolved O}_2 \text{ molecules}] \times 4 / [\text{the number of incident photons}]$$

The photon flux of the monochromatic light through a band-pass filter (Asahi Spectra, HMZ0420,  $\lambda=420$  nm) was measured using a silicon diode head (Ophir Optorionics, PD300-UV head and NOVA display).

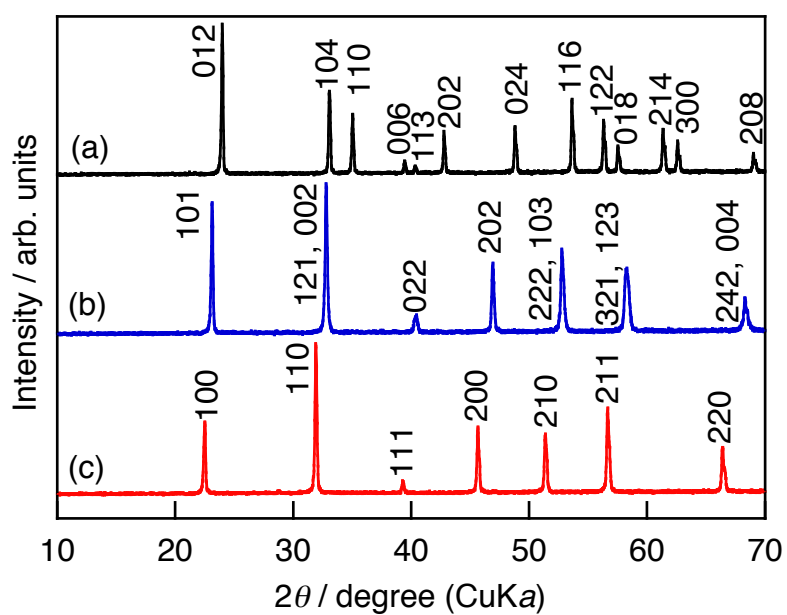

**Figure S1.** XRD patterns of (a) LiTaO<sub>3</sub>:Ir(0.1%),La(0.2%), (b) NaTaO<sub>3</sub>:Ir(0.1%),La(0.2%), and (c) KTaO<sub>3</sub>:Ir(0.1%),La(0.2%).

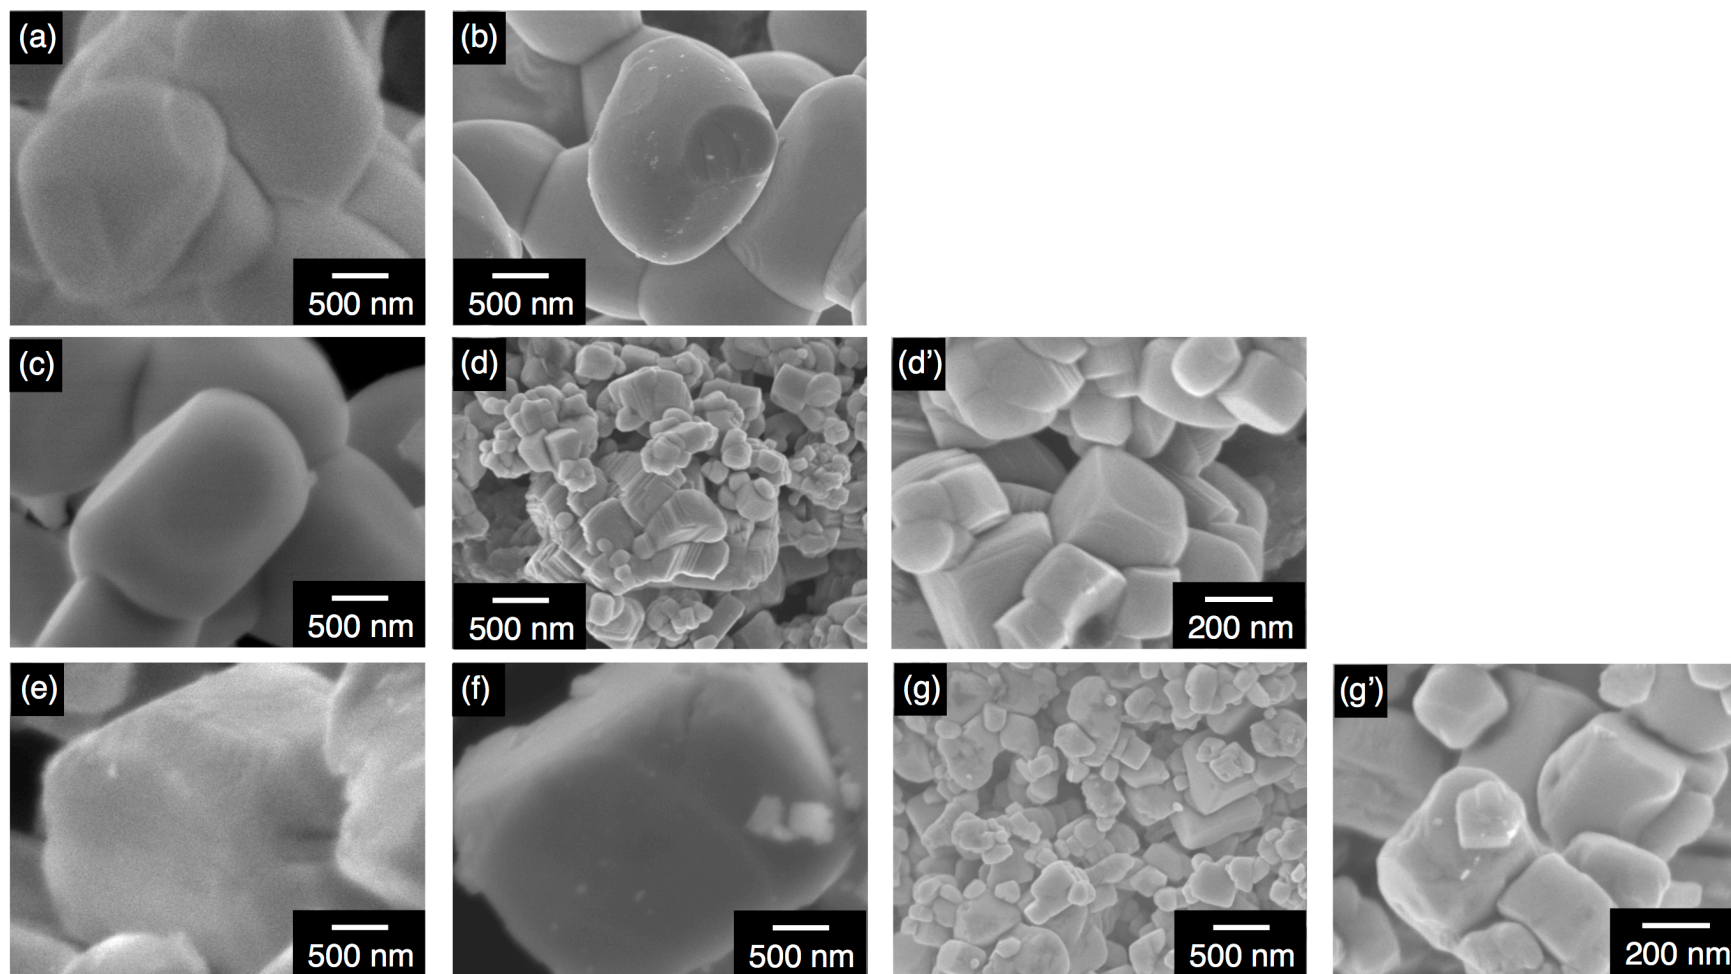

**Figure S2.** SEM images of (a) non-doped LiTaO<sub>3</sub>, (b) LiTaO<sub>3</sub>:Ir(0.1%),La(0.2%), (c) non-doped NaTaO<sub>3</sub>, (d, d') NaTaO<sub>3</sub>:Ir(0.1%),La(0.2%), (e) non-doped KTaO<sub>3</sub>, (f) NaTaO<sub>3</sub>:Ir(0.1%), and (g, g') KTaO<sub>3</sub>:Ir(0.1%),La(0.2%).

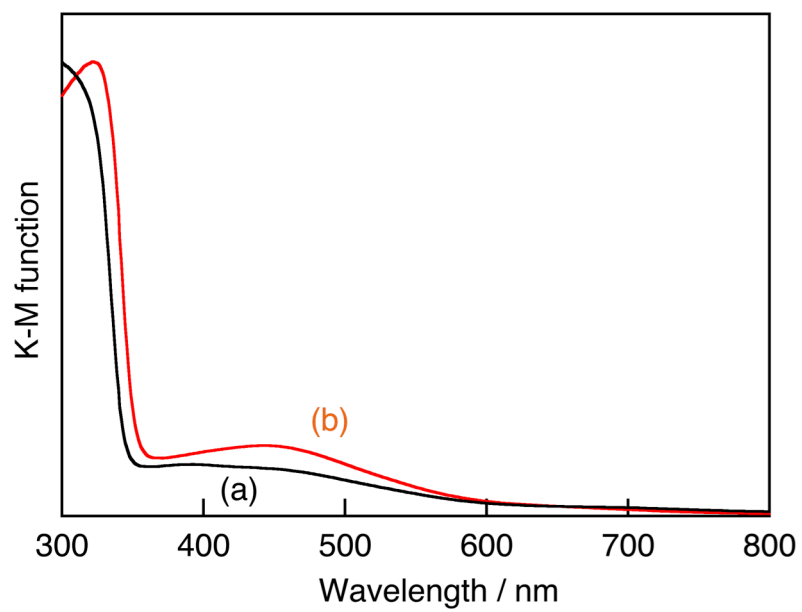

**Figure S3.** Diffuse reflectance spectra of (a)  $\text{KTaO}_3\text{:Ir}(0.1\%),\text{La}(0.2\%)$  and (b)  $\text{KTaO}_3\text{:Ir}(0.1\%)$ .

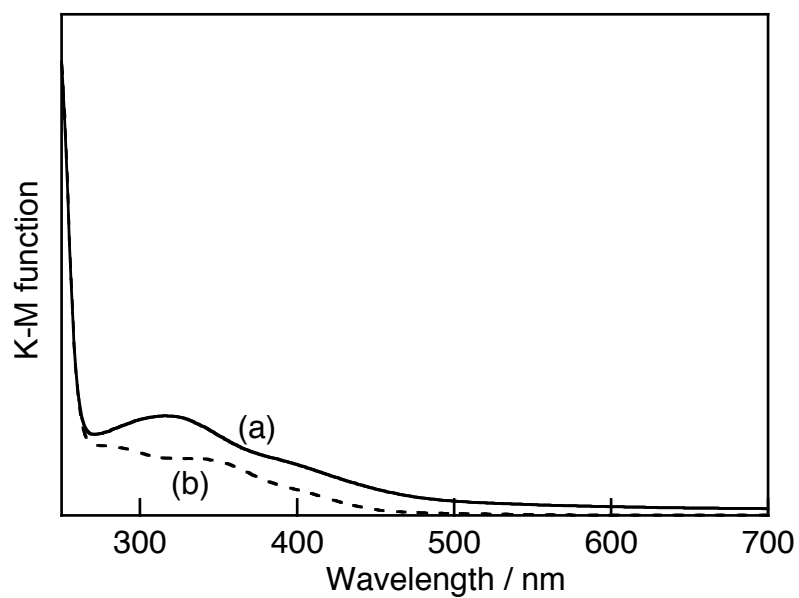

**Figure S4.** Diffuse reflectance spectra of  $\text{LiTaO}_3:\text{Ir}(0.1\%),\text{La}(0.2\%)$  (a) with and (b) without  $\text{H}_2$  reduction at 673 K.
